# Supplementary material for: The IHAT-GUT Iron Supplementation Trial in Rural Gambia: Barriers, Facilitators, and Benefits
Source: MDPI journal article supplement (doi:10.3390/nu13041140), 2021-03-30
Supplement: s1 [file s1]

Supplementary Data

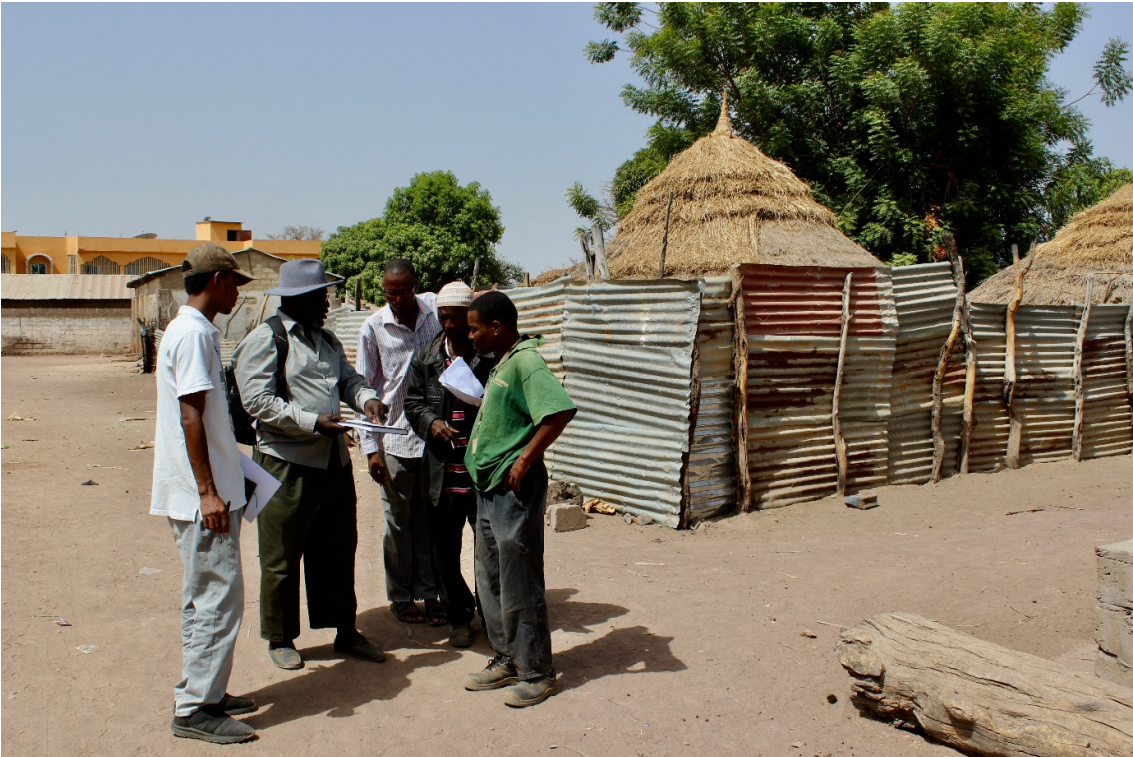

Figure S1. Photograph of members of the IHAT-GUT field team.

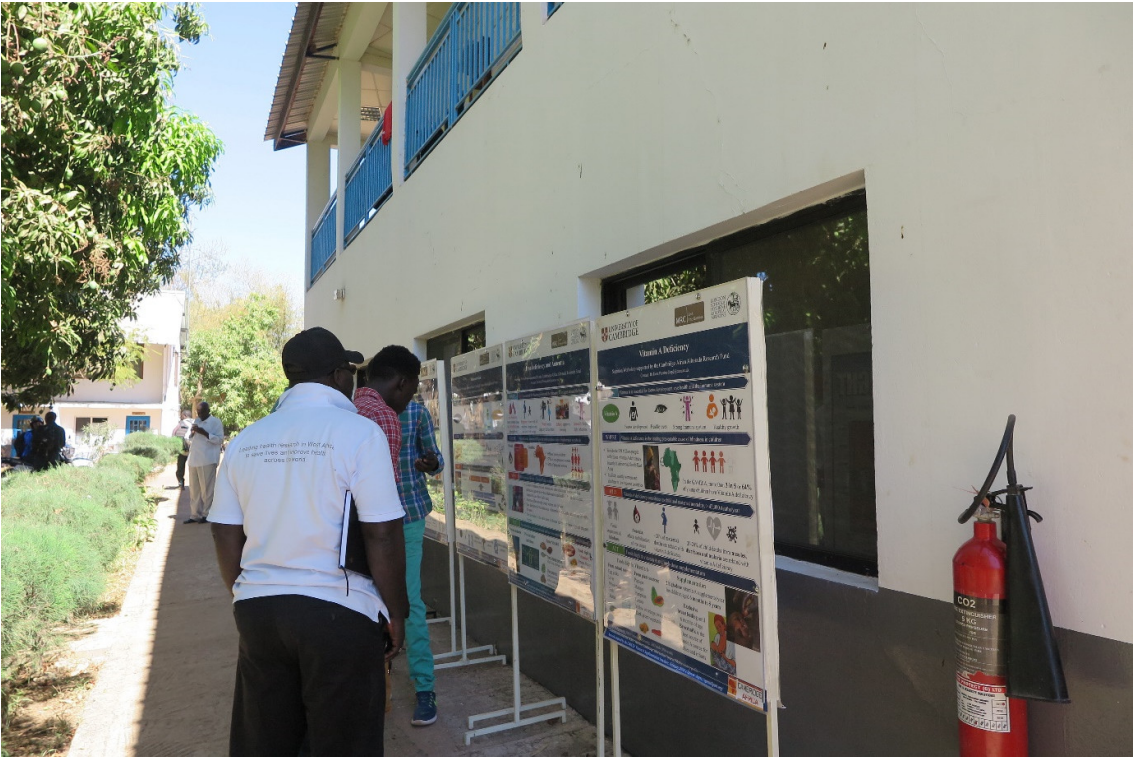

Figure S2. Photograph of the poster session at the Nutrition Workshop.



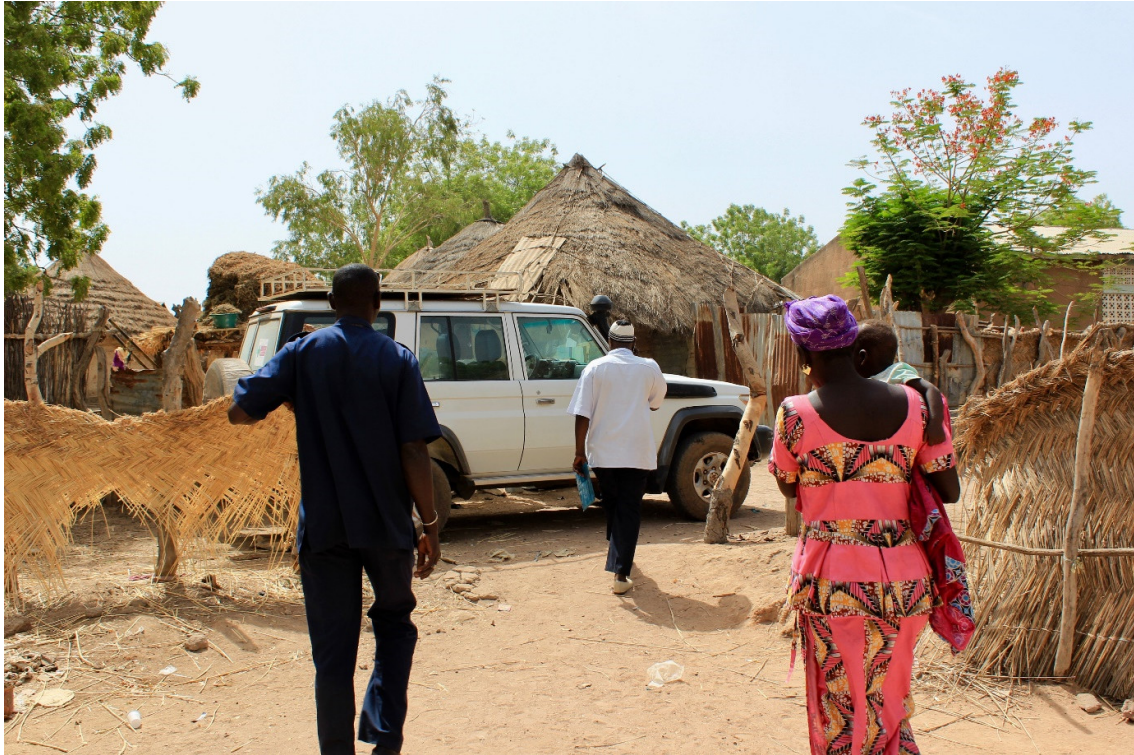

**Figure S3.** Photograph of Driver and Nurse Coordinator picking up a participant and mother from their home for evaluation of an adverse event.
